# Supplementary material for: Flexible and efficient triboelectric nanogenerators based on PVDF and boron nitride composite yarns and mats
Source: Royal Society of Chemistry journal article supplement (doi:10.1039/d5nr05178a), 2026-06-04
Supplement: d5nr05178a1.pdf [file d5nr05178a1.pdf]

## Supplementary Information

### Flexible and Efficient Triboelectric Nanogenerators based on PVDF and Boron Nitride Composite Yarns and Mats

Sunija Sukumaran, Ahmadreza Moradi, Piotr K. Szewczyk, Urszula Stachewicz\*

*Faculty of Metals Engineering and Industrial Computer Science, AGH University of Krakow  
30-059 Krakow, Poland*

**Table S1.** Electrospinning parameters for PVDF and BN/PVDF composite with different BN content at RH = 30 % and T = 25 °C.

| Sample            | BN content (wt.%) | Voltage (kV) | Distance (cm) (Needle tip to collector) | Flow rate (mlh <sup>-1</sup> ) |
|-------------------|-------------------|--------------|-----------------------------------------|--------------------------------|
| PVDF M            | 0                 | 20           | 18                                      | 1                              |
| 1 wt.% BN/PVDF M  | 1                 | 22           | 20                                      | 1                              |
| 3 wt.% BN/PVDF M  | 3                 | 22           | 20                                      | 1                              |
| 5 wt.% BN/PVDF M  | 5                 | 24           | 20                                      | 1                              |
| 10 wt.% BN/PVDF M | 10                | 26           | 20                                      | 1                              |

**Table S2.** Summary of crystallinity and  $\beta$  phase content of BN/PVDF composite.

| Sample            | F( $\beta$ ) (%) | T <sub>m</sub> (°C) | $\chi_c$ (%) |
|-------------------|------------------|---------------------|--------------|
| PVDF M            | 67               | 169.02              | 44.5         |
| 1 wt.% BN/PVDF M  | 76               | 171.37              | 44.1         |
| 3 wt.% BN/PVDF M  | 78               | 173.07              | 47.5         |
| 5 wt.% BN/PVDF M  | 82               | 174.26              | 48.3         |
| 10 wt.% BN/PVDF M | 82               | 173.42              | 45.4         |
| PVDF Y            | 71               | 170.64              | 42.7         |
| 5 wt.% BN/PVDF Y  | 79               | 171.60              | 43.1         |

**Table S3.** Comparative summary of the  $\beta$ -phase content of PVDF and PVDF-based composites reported in the literature and in this work.

| <b>Material</b>                                                       | <b>Filler content (wt.%)</b>   | <b>PVDF <math>\beta</math> phase fraction (%)</b> | <b>PVDF composite <math>\beta</math> phase fraction (%)</b> | <b>Authors' name</b>           |
|-----------------------------------------------------------------------|--------------------------------|---------------------------------------------------|-------------------------------------------------------------|--------------------------------|
| PVDF/ phenyl-isocyanate functionalized graphene oxide (IGO) nanofiber | 0.05                           | 68.7                                              | 97.1                                                        | Ramasamy et al. <sup>1</sup>   |
| PVDF/GO nanofiber                                                     | 2                              | ~82                                               | ~87                                                         | Yang et al. <sup>2</sup>       |
| PVDF/3Ag-P (metal phosphate nanostructure) film                       | 3                              | 68                                                | 96                                                          | Bahloul et al. <sup>3</sup>    |
| PVDF/CNF fiber                                                        | 0.5                            | 86.9                                              | 93.2                                                        | Khadka et al. <sup>4</sup>     |
| PVDF -TrFE/ Bismuth Ferrite composite film                            | 6                              | 80.2                                              | 83.7                                                        | Tripathy et al. <sup>5</sup>   |
| PVDF/MWCNT-BaTiO <sub>3</sub> electrospun fiber                       | 15 wt.% BT and 0.15 wt.% MWCNT | 77.45%                                            | 90.21                                                       | Lin et al. <sup>6</sup>        |
| PVDF/Graphene fiber                                                   | 0.1                            | 77                                                | 83                                                          | Abolhasani et al. <sup>7</sup> |
| PVDF/MXene microinjected specimen                                     | 5                              | 43.5                                              | 85.3                                                        | Han et al. <sup>8</sup>        |
| PVDF-TiO <sub>2</sub> film                                            | 10                             | 52                                                | 89                                                          | Kulkarni et al. <sup>9</sup>   |
| Nitrogenous carbon dot/PVDF film                                      | 2.5% mass percent              | ~48                                               | 80.4                                                        | Sarkar et al. <sup>10</sup>    |
| PVDF/BaTiO <sub>3</sub>                                               | 2                              | 73.9                                              | 81.23                                                       | Kumar et al. <sup>11</sup>     |
| PVDF-rGO-MoS <sub>2</sub> film                                        |                                | 55                                                | 72                                                          | Faraz et al. <sup>12</sup>     |
| PVDF/Silicon carbide film                                             | 6                              | -                                                 | 81                                                          | Shafeek et al. <sup>13</sup>   |
| PVDF/hBN nanofiber                                                    | 0.4                            | ~76                                               | ~86                                                         | Yadav et al. <sup>14</sup>     |
| PVDF/BN nanosheet fiber                                               | 2                              | 45                                                | 46                                                          | Zhang et al. <sup>15</sup>     |
| PVDF/hBN film                                                         | 1                              | 62.2                                              | 85.4                                                        | Kumar et al. <sup>16</sup>     |
| PVDF/BN electrospun fiber                                             | 5                              | 67                                                | 82                                                          | This work                      |
| PVDF/BN Yarn                                                          | 5                              | 71                                                | 79                                                          | This work                      |

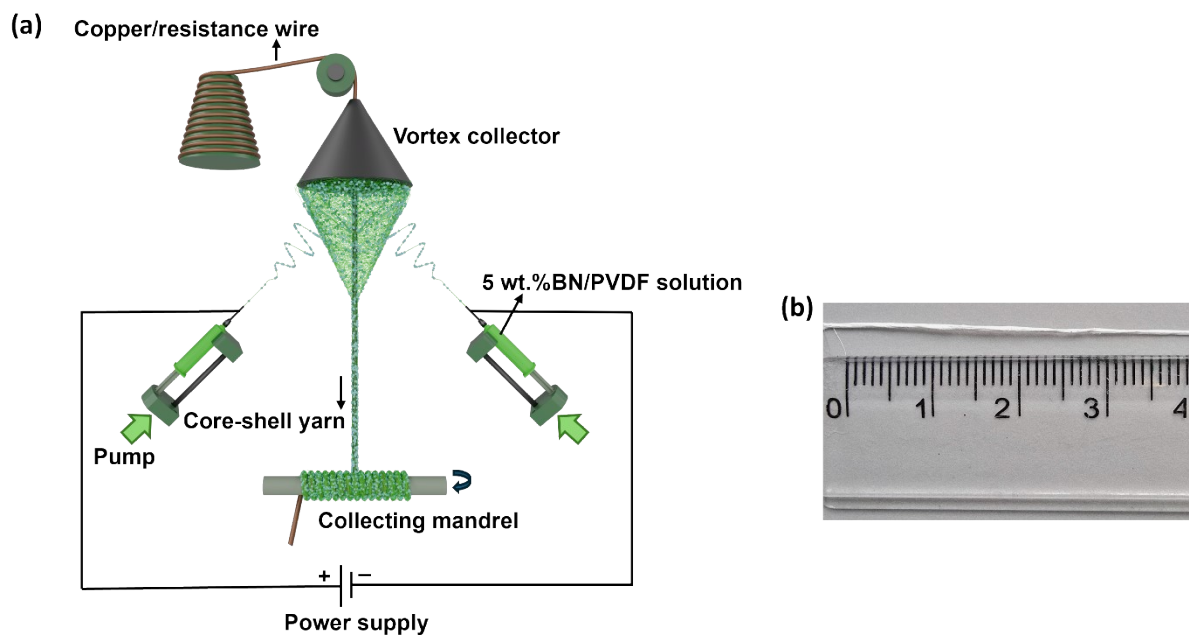

**Fig. S1** (a) Schematic representation of the 5 wt.% BN/PVDF yarn fabrication process (b) Photograph of the produced 5 wt.% BN/PVDF yarn.

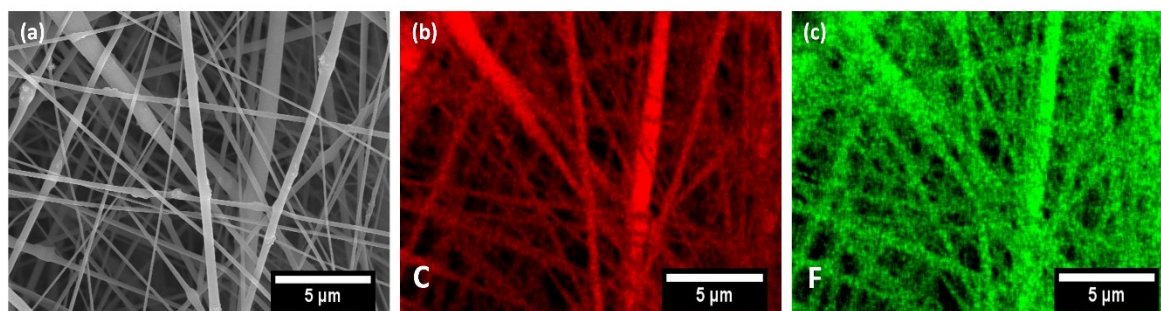

**Fig. S2** (a) Schematic representation of the 5 wt.% BN/PVDF yarn fabrication process (b) Photograph of the produced 5 wt.% BN/PVDF yarn.

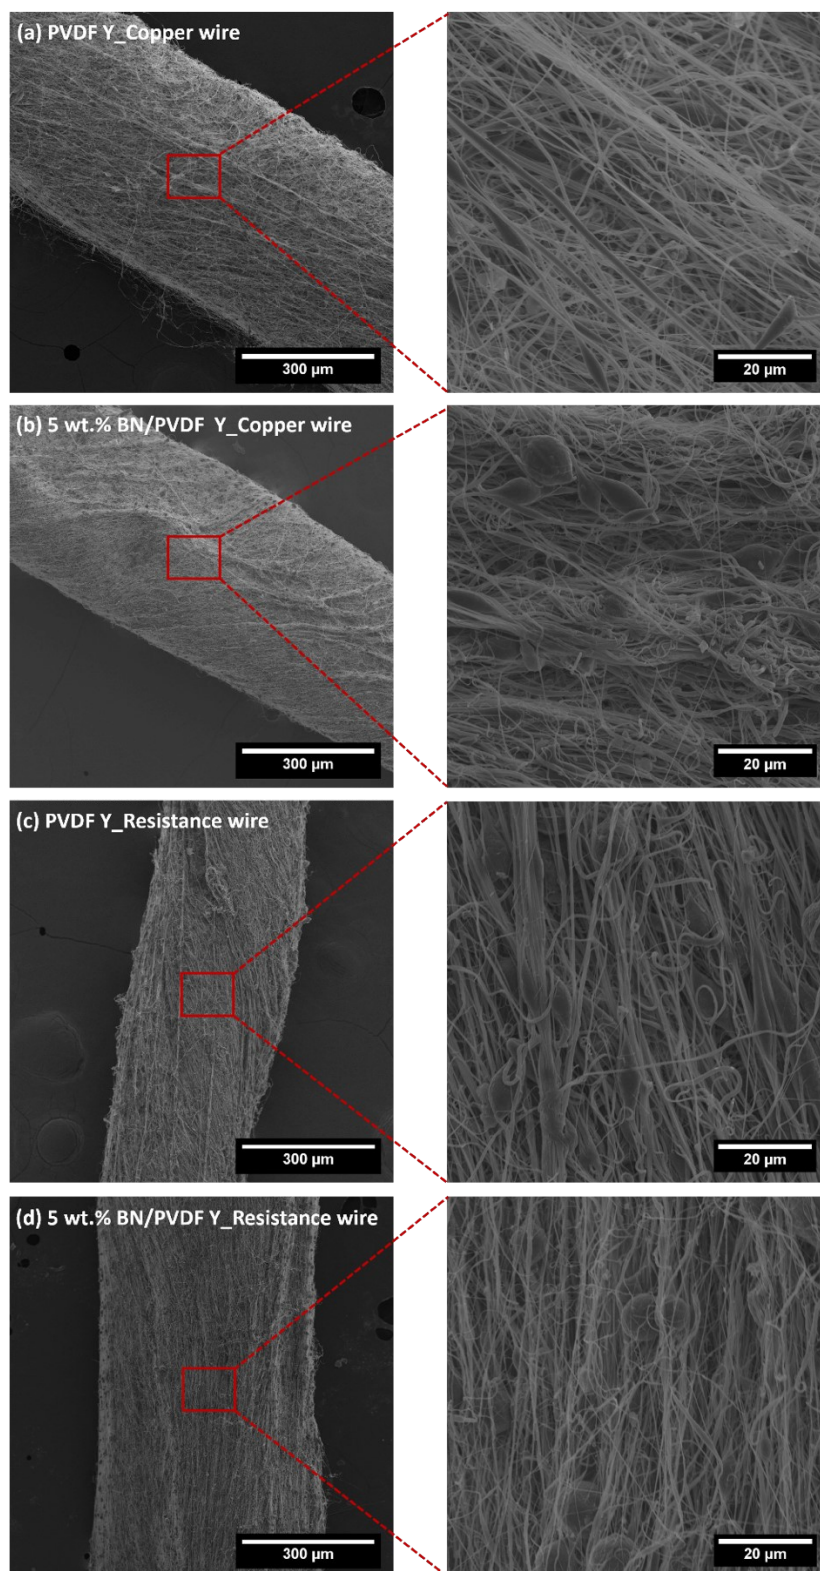

**Fig. S3.** SEM micrographs of the surface morphology of the yarn (left) and the higher magnification view of the fibers (right) for (a) PVDF Y on copper wire (b) 5 wt.% BN/PVDF Y on copper wire (c) PVDF Y on resistance wire (d) 5 wt.% BN/PVDF Y on resistance wire.

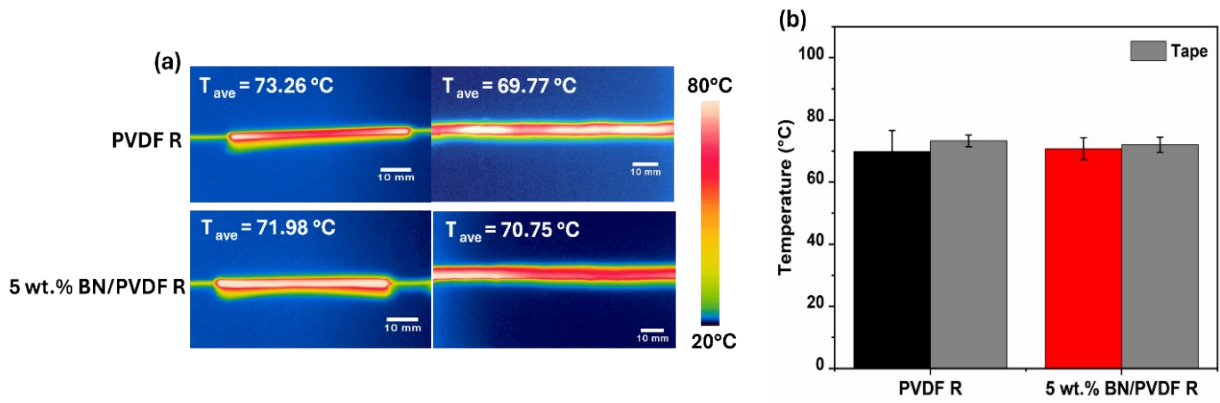

**Fig. S4.** (a) Infrared images of standard tapes and the rolled yarns with the corresponding average temperature (b) The column chart with the average temperature of the rolled yarns and the reference tape.

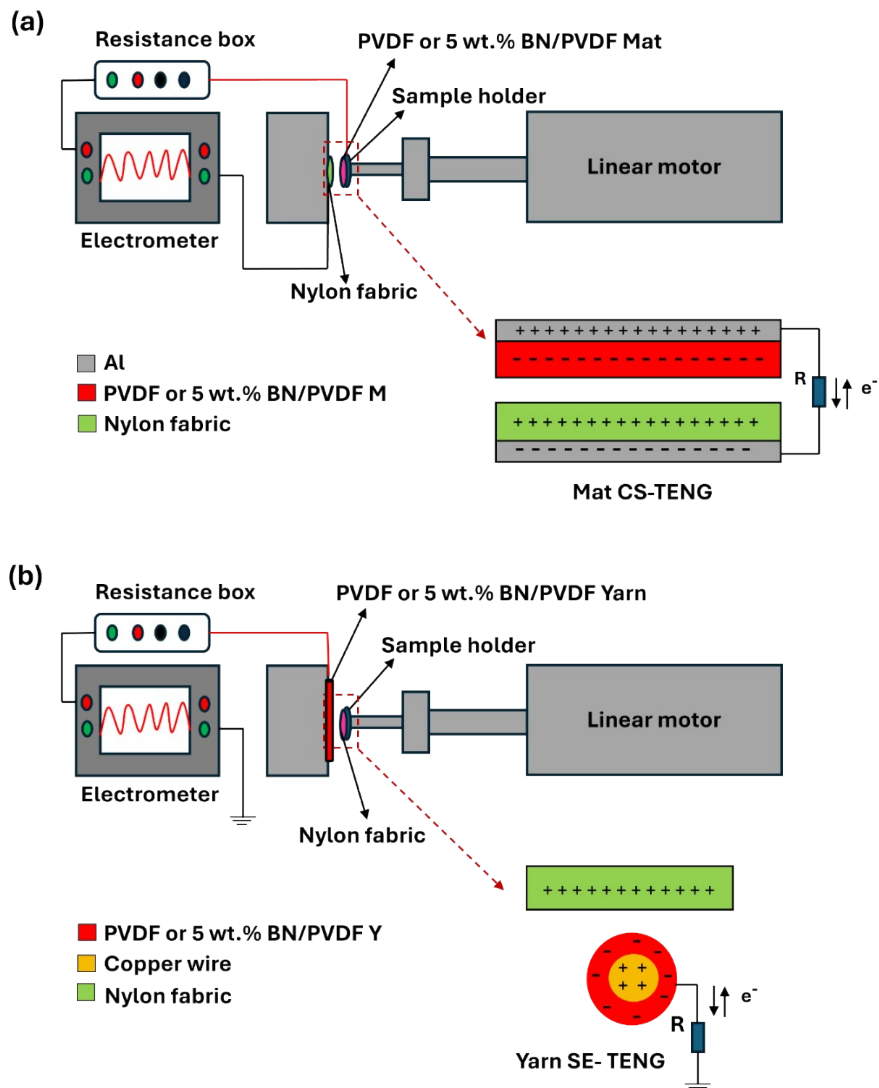

**Fig. S5.** Schematic representation of the triboelectricity testing system operating in different modes (a) Mat working in contact separation (CS) mode (b) Yarn working in single electrode (SE) mode.

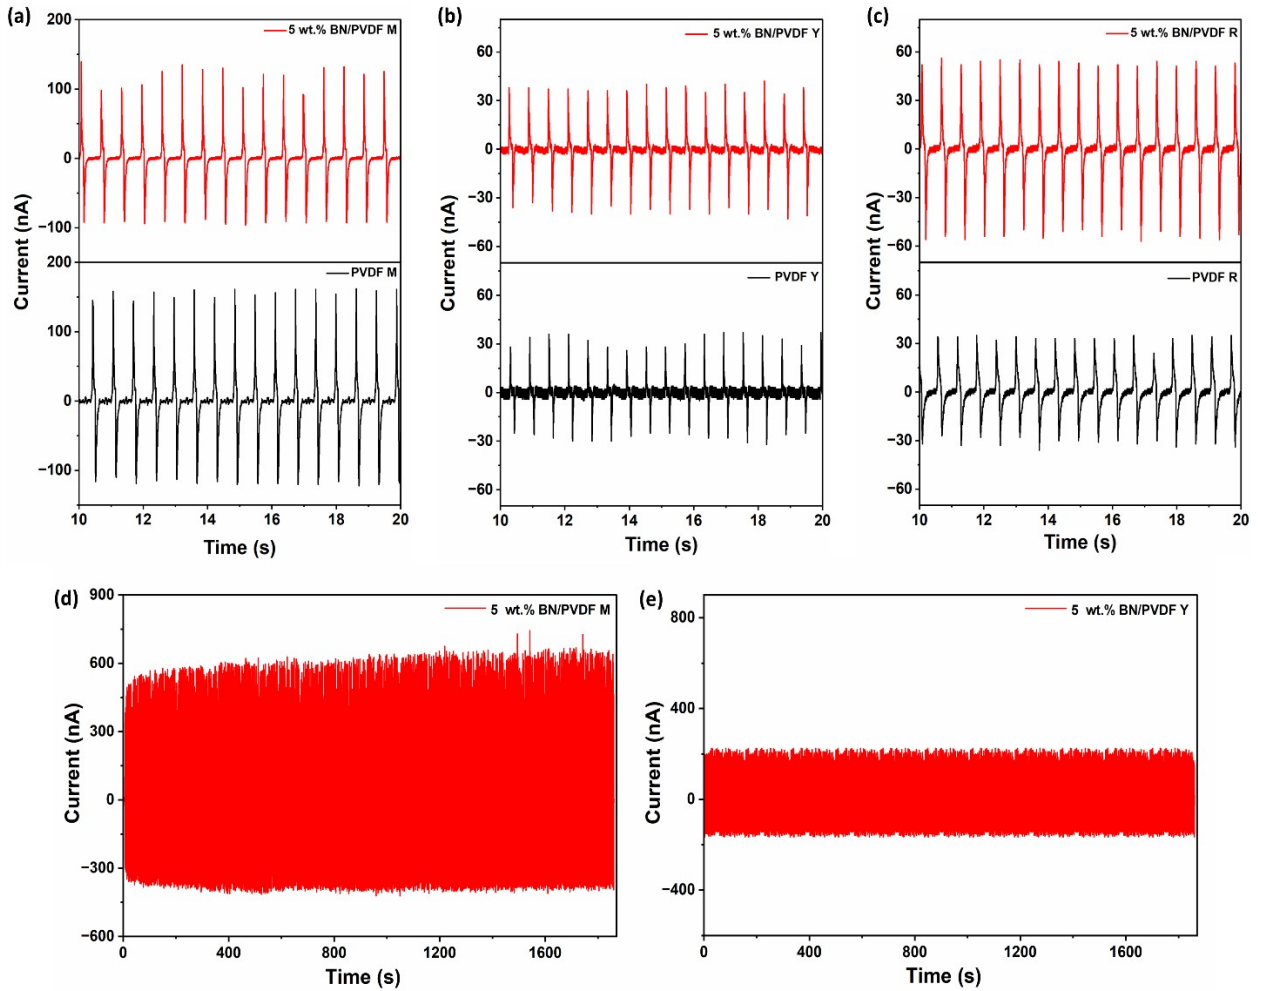

**Fig. S6.** Short-circuit current output corresponding to the load resistance at which the maximum power density was obtained for the TENG (a) PVDF M and 5 wt.%BN/PVDF M (b) PVDF Y and 5 wt.%BN/PVDF Y (c) PVDF R and 5 wt.%BN/PVDF R. Operational stability of the devices over 2000 contact-release cycles at  $\sim 0 \Omega$ , demonstrating consistent output performance of mat and yarn (d) 5 wt.%BN/PVDF M and (e) 5 wt.%BN/PVDF Y.

**Table S4.** Comparison of the power density of the BN/PVDF yarn in this work with previously reported yarn-based TENGs

| <b>Material</b>                                                                                    | <b>Fabrication</b>                                                                               | <b>Size</b>                           | <b>Power density (mWm<sup>-2</sup>)</b> | <b>Authors' name</b>        |
|----------------------------------------------------------------------------------------------------|--------------------------------------------------------------------------------------------------|---------------------------------------|-----------------------------------------|-----------------------------|
| AgNW/MnO <sub>2</sub> -TPU layer and sheath-core TPU/CB@AgNW/PMMA                                  | combining wet spinning with electrospinning, which was helically wound around the yarn-based ASC | 1 cm in length and 0.5 cm in diameter | 2.14                                    | R. Tao et al. <sup>17</sup> |
| Core-shell yarn with core as conductive Ag-nylon yarn) and shell -PVDF-PTFE or PCL                 | Yarn electrospinning                                                                             | 3×3 cm                                | 2.2                                     | Zhou et al. <sup>18</sup>   |
| Core - shell yarn with core as carbon yarn and shell-PA66-ZnO                                      | Electrospinning on the carbon yarn                                                               | 4×4 cm                                | 2.7                                     | Zamani et al. <sup>19</sup> |
| Core - shell yarn with core nickel-plated aramid yarn and shell FEP-doped FPI                      | Yarn electrospinning                                                                             | 2×2 cm                                | 4.9                                     | Hao et al. <sup>20</sup>    |
| Core-shell yarn with core as nylon conductive yarn and shell PVDF-TrFE                             | Air-flow driven system (blow spinning)                                                           | 2×4 cm                                | 5.5                                     | Chen et al. <sup>21</sup>   |
| Core - shell yarn with core Ag yarn and shell-TPU                                                  | Direct electrospinning on the Ag yarn as the collector                                           | 5 cm in length and 1.3 mm diameter    | 5.6                                     | Hu et al. <sup>22</sup>     |
| Core-double shell yarn - core as conductive Ag-nylon yarn and shell 1 (PI) and shell 2 (PVDF-PDMS) | Yarn electrospinning                                                                             | 7.065 cm <sup>2</sup>                 | 7.7                                     | Akram et al. <sup>23</sup>  |
| Core-shell yarn with core copper wire and shell PVDF-Si <sub>3</sub> N <sub>4</sub> and shell PU   | Yarn electrospinning                                                                             | 5 cm x 5 cm                           | 22.4                                    | X. Tao et al. <sup>24</sup> |
| Core - shell yarn with core-carbon fiber and shell- PVDF-graphene                                  | Yarn electrospinning                                                                             | 5 cm x 5 cm                           | 25.5                                    | Yang et al. <sup>25</sup>   |
| Core-shell yarn - core stainless steel and shell-PU or Spandex                                     | not electrospinning                                                                              | 4.5 cm x 8 cm                         | 60                                      | Yu et al. <sup>26</sup>     |
| Core- shell yarn with core -stainless steel strands and shell (PA66) or (PVDF-TrFE)                | Yarn electrospinning                                                                             | -                                     | 62.1                                    | Wang et al. <sup>27</sup>   |
| Core-shell yarn - core stainless steel and shell-                                                  | Direct electrospinning and rolling                                                               | 5 cm x 5 cm                           | 93                                      | Guan et al. <sup>28</sup>   |

|                                                                                                                                        |                                                          |                                        |       |                               |
|----------------------------------------------------------------------------------------------------------------------------------------|----------------------------------------------------------|----------------------------------------|-------|-------------------------------|
| PVDF-TrFE or shell PA66                                                                                                                |                                                          |                                        |       |                               |
| Core-shell yarn with core-CNT yarn and shell-PA11                                                                                      | Direct electrospinning on the CNT yarns as the collector | 7.3 mm <sup>2</sup>                    | 121   | Szewczyk et al. <sup>29</sup> |
| Core-shell yarn with core as carbon nanotube yarn and shell-PVDF                                                                       | Direct electrospinning on the CNT yarns as the collector | 0.096 cm <sup>2</sup>                  | 207   | Busolo et al. <sup>30</sup>   |
| Core-shell yarn with core-PTFE twisted with carbon fiber and shell PI + SiO <sub>2</sub>                                               | yarn electrospinning (single nozzle)                     | -                                      | 243   | Xing et al. <sup>31</sup>     |
| Core-shell yarn with core as copper wire and shell 5 wt.% BN/PVDF                                                                      | Yarn electrospinning                                     | 0.195 cm <sup>2</sup>                  | 303   | This work                     |
| Core-shell yarn with core as copper wire and shell 50 wt.% Ti <sub>3</sub> C <sub>2</sub> T <sub>x</sub> MXene nanoflake/PAN composite | Yarn electrospinning                                     | 2.4 cm in length and 0.238 mm diameter | 432.7 | Moradi et al. <sup>32</sup>   |
| Core-double shell yarn-core as copper yarn and shell1 (PA11 + ZnO) and shell2 (polyester fibers)                                       | Combination of electrospinning and ring spinning         | 2.5 cm x 2.5 cm                        | 487.8 | Chen et al. <sup>33</sup>     |
| Core-shell yarn - core as conductive silver yarn and shell- hybrid PAN/PVDF                                                            | Yarn electrospinning                                     | 1.375 cm <sup>2</sup>                  | 611   | Ma et al. <sup>34</sup>       |

## References

- 1 M. S. Ramasamy, A. Rahaman and B. Kim, *Ceramics International*, 2021, **47**, 11010–11021.
- 2 J. Yang, Y. Zhang, Y. Li, Z. Wang, W. Wang, Q. An and W. Tong, *Materials Today Communications*, 2021, **26**, 101629.
- 3 C. Bahloul, A. Eddiai, O. Cherkaoui, F.-Z. Semlali, M. El Achaby, and others, *RSC advances*, 2025, **15**, 15218–15239.
- 4 A. Khadka, E. Samuel, B. Joshi, A. Aldalbahi, G. Periyasami, H.-S. Lee and S. S. Yoon, *Nano Energy*, 2025, **139**, 110991.
- 5 A. Tripathy, N. P. M. J. Raj, B. Saravanakumar, S.-J. Kim and A. Ramadoss, *Journal of Alloys and Compounds*, 2023, **932**, 167569.
- 6 X. Lin, F. Yu, X. Zhang, W. Li, Y. Zhao, X. Fei, Q. Li, C. Yang and S. Huang, *ACS Applied Nano Materials*, 2023, **6**, 11955–11965.
- 7 M. M. Abolhasani, K. Shirvanimoghaddam and M. Naebe, *Composites Science and Technology*, 2017, **138**, 49–56.
- 8 R. Han, L. Zheng, G. Li, G. Chen, S. Ma, S. Cai and Y. Li, *ACS applied materials & interfaces*, 2021, **13**, 46738–46748.
- 9 N. D. Kulkarni and P. Kumari, *Materials Research Bulletin*, 2023, **157**, 112039.
- 10 D. Sarkar, N. Das, M. M. Saikh, P. Biswas, S. Roy, S. Paul, N. A. Hoque, R. Basu and S. Das, *Ceramics International*, 2023, **49**, 5466–5478.
- 11 M. Kumar, N. D. Kulkarni and P. Kumari, *Materials Research Bulletin*, 2024, **174**, 112739.

- 12M. Faraz, H. H. Singh and N. Khare, *Journal of Alloys and Compounds*, 2022, **890**, 161840.
- 13S. Shafeek, N. T. Balakrishnan, B. Fatma, A. Garg, D. Morton, J. Luo, P. Raghavan, and others, *Nano Energy*, 2023, **107**, 108146.
- 14P. Yadav, T. D. Raju and S. Badhulika, *ACS Appl. Electron. Mater.*, 2020, **2**, 1970–1980.
- 15J. Zhang, H. Wang, P. Blanloeuil, G. Li, Z. Sha, D. Wang, W. Lei, C. Boyer, Y. Yu, R. Tian and C. H. Wang, *Composites Communications*, 2020, **22**, 100535.
- 16A. Kumar, S. Sharma, M. Jayasimhadri and N. K. Puri, *Journal of Materials Science: Materials in Electronics*, 2026, **37**, 98.
- 17R. Tao, Y. Mao, C. Gu and W. Hu, *Chemical Engineering Journal*, 2024, **496**, 154358.
- 18M. Zhou, F. Xu, L. Ma, Q. Luo, W. Ma, R. Wang, C. Lan, X. Pu and X. Qin, *Nano Energy*, 2022, **104**, 107885.
- 19M. Zamani, A. Valipouri, S. A. H. Ravandi and A. Alsikh, *Energy Technology*, 2024, **12**, 2400687.
- 20M. Hao, X. Hu, Z. Chen, B. Yang, Y. Liu, Q. Wang, X. Gao, Y. Liu, X. Wang and Y. Liu, *ACS Applied Materials & Interfaces*, 2024, **17**, 1038–1048.
- 21Y. Chen, J. Hua, Y. Ling, Y. Liu, M. Chen, B. Ju, W. Gao, A. Mills, X. Tao and R. Yin, *Chemical Engineering Journal*, 2023, **477**, 147026.
- 22S. Hu, Z. Ge, M. Chen, P. Ding, W. Zhai, G. Zheng, K. Dai, C. Liu and C. Shen, *Chemical Engineering Journal*, 2025, **510**, 161794.
- 23W. Akram, Q. Chen, X. Zhang, S. Ren, L. Niu and J. Fang, *Nano Energy*, 2024, **131**, 110275.
- 24X. Tao, Y. Zhou, K. Qi, C. Guo, Y. Dai, J. He and Z. Dai, *Journal of Colloid and Interface Science*, 2022, **608**, 2339–2346.
- 25T. Yang, C. Wan, X. Zhang, T. Liu, L. Niu, J. Fang and Y. Liu, *Nano Res.*, 2024, **17**, 4478–4488.
- 26A. Yu, X. Pu, R. Wen, M. Liu, T. Zhou, K. Zhang, Y. Zhang, J. Zhai, W. Hu and Z. L. Wang, *ACS nano*, 2017, **11**, 12764–12771.
- 27Y. Wang, L. Chu, S. Meng, M. Yang, Y. Yu, X. Deng, C. Qi, T. Kong and Z. Liu, *Advanced Science*, 2024, **11**, 2401436.
- 28X. Guan, B. Xu, M. Wu, T. Jing, Y. Yang and Y. Gao, *Nano Energy*, 2021, **80**, 105549.
- 29P. K. Szewczyk, T. Busolo, S. Kar-Narayan and U. Stachewicz, *ACS Appl. Mater. Interfaces*, 2023, **15**, 56575–56586.
- 30T. Busolo, P. K. Szewczyk, M. Nair, U. Stachewicz and S. Kar-Narayan, *ACS Appl. Mater. Interfaces*, 2021, **13**, 16876–16886.
- 31F. Xing, Z. Ou, X. Gao, B. Chen and Z. L. Wang, *Advanced Functional Materials*, 2022, **32**, 2205275.
- 32A. Moradi, P. K. Szewczyk and U. Stachewicz, *Advanced Materials*, 2025, e22098.
- 33W. Chen, W. Fan, Q. Wang, X. Yu, Y. Luo, W. Wang, R. Lei and Y. Li, *Nano Energy*, 2022, **103**, 107769.
- 34L. Ma, M. Zhou, R. Wu, A. Patil, H. Gong, S. Zhu, T. Wang, Y. Zhang, S. Shen, K. Dong, and others, *ACS nano*, 2020, **14**, 4716–4726.
